# Supplementary material for: Computational insights on the role of film thickness on the physical properties of ultrathin polysulfone membranes
Source: Royal Society of Chemistry journal article supplement (doi:10.1039/c7ra07277e), 2017-01-01
Supplement: c7ra07277e1.pdf [file c7ra07277e1.pdf]

## Supplementary Information

The Condensed-phase Optimized Molecular Potentials for Atomistic Simulation Studies (COMPASS) force field:

$$\begin{aligned}
 E = & \sum_b [K_2(b - b_0)^2 + K_3(b - b_0)^3 + K_4(b - b_0)^4] \\
 & + \sum_{\theta}^{(i)} [H_2(\theta - \theta_0)^2 + H_3(\theta - \theta_0)^3 + H_4(\theta - \theta_0)^4] \\
 & + \sum_{\phi}^{(ii)} \{V_1[1 - \cos(\phi - \phi_1^0)] + V_2[1 - \cos(\phi - 2\phi_2^0)] + V_3[1 - \cos(\phi - 3\phi_3^0)]\} \\
 & + \sum_x^{(iii)} K_x x^2 + \sum_b \sum_{b'}^{(iv)} F_{bb'}(b - b_0)(b' - b'_0) + \sum_{\theta} \sum_{\theta'}^{(v)} F_{\theta\theta'}(\theta - \theta_0)(\theta' - \theta'_0) \\
 & + \sum_b \sum_{\theta}^{(vii)} F_{b\theta}(b - b_0)(\theta - \theta_0) + \sum_b \sum_{\phi}^{(viii)} (b - b_0)[V_1 \cos \phi + V_2 \cos 2\phi + V_3 \cos 3\phi] \\
 & + \sum_{b'} \sum_{\theta}^{(ix)} F_{b\theta}(b' - b'_0) + [V_1 \cos \phi + V_2 \cos 2\phi + V_3 \cos 3\phi] \\
 & + \sum_{\phi} \sum_{\theta} \sum_{\theta'}^{(x)} K_{\phi\theta\theta'} \cos \phi (\theta - \theta_0)(\theta' - \theta'_0) + \sum_{i>j} \frac{q_i q_j}{r_{ij}} + \sum_{i>j} \varepsilon_{ij} \left[ 2 \left( \frac{\sigma_{ij}}{r_{ij}} \right)^9 - 3 \left( \frac{\sigma_{ij}}{r_{ij}} \right)^6 \right] \quad (S1)
 \end{aligned}$$

(x)
(xi)
(xii)

In COMPASS, the energy term,  $E$ , has been characterized via three major categories, which are namely: (a) the bonded energy (b) the cross-terms and (c) the non-bonded energy contributions. The bonded energy is consisted of contributions (i) – (iv) in (S1) such as the following, (i) the covalent bond stretching energy terms (ii) the bond angle bending energy terms (iii) the torsion angle rotation energy terms of the polymeric chains, which has been fitted by a Fourier series function readily available in the software and (iv) the out-of-plane energy or improper term that has been described as a harmonic function. On the other hand, the cross interaction contribution is constituted through the (v) – (x) terms in (8), which encompass the characterization of dynamic variation among bond stretching, bending, and torsion angle rotation. Finally, the last two terms, (xi) and (xii), which are representative terms of the non-bonded energy that illustrate the interactive forces between polymer chains

## Supplementary Information

and small molecules, describe the Columbic electrostatic force and van der Waals interaction respectively <sup>1</sup>. Detail description pertaining to the energy contributions can be found elsewhere in published literature <sup>2,3</sup> and within Materials Studio itself <sup>4</sup>.

For the non-bonded Lennard Jones energy term, it has been described with a sixth-order combination rule in order to calculate the corresponding parameters, such as that provided in (S2) and (S3).

$$\sigma_{ij} = \left( \frac{\sigma_i^6 + \sigma_j^6}{2} \right)^{\frac{1}{6}} \quad (S2)$$

$$\varepsilon_{ij} = 2\sqrt{\varepsilon_i \varepsilon_j} \left( \frac{\sigma_i^3 \sigma_j^3}{\sigma_i^6 + \sigma_j^6} \right) \quad (S3)$$

In (S2) and (S3),  $\sigma_{ij}$  is the distance at which the potential energy is zero,  $\varepsilon_{ij}$  corresponds to the well-depth of the interaction potential, while  $\sigma_i$  and  $\varepsilon_i$  represent the size and energy parameters of the interaction atoms respectively, which are commonly known as the Lennard Jones parameters. As for the Columbic electrostatic term, the partial charges are computed from the charge bond increment,  $\delta_{ij}$ , which represents charge separation between two valence-bonded atoms <sup>3,5</sup>. The net charge,  $q_i$ , for atom i is a summation of all charge bond increments related to atom i, such as that depicted in (S4).

$$q_i = \sum_j \delta_{ij} \quad (S4)$$

## Supplementary Information

Cavity Energetic Sizing Algorithm <sup>6</sup>. Symbols are provided in the Abbreviation section.

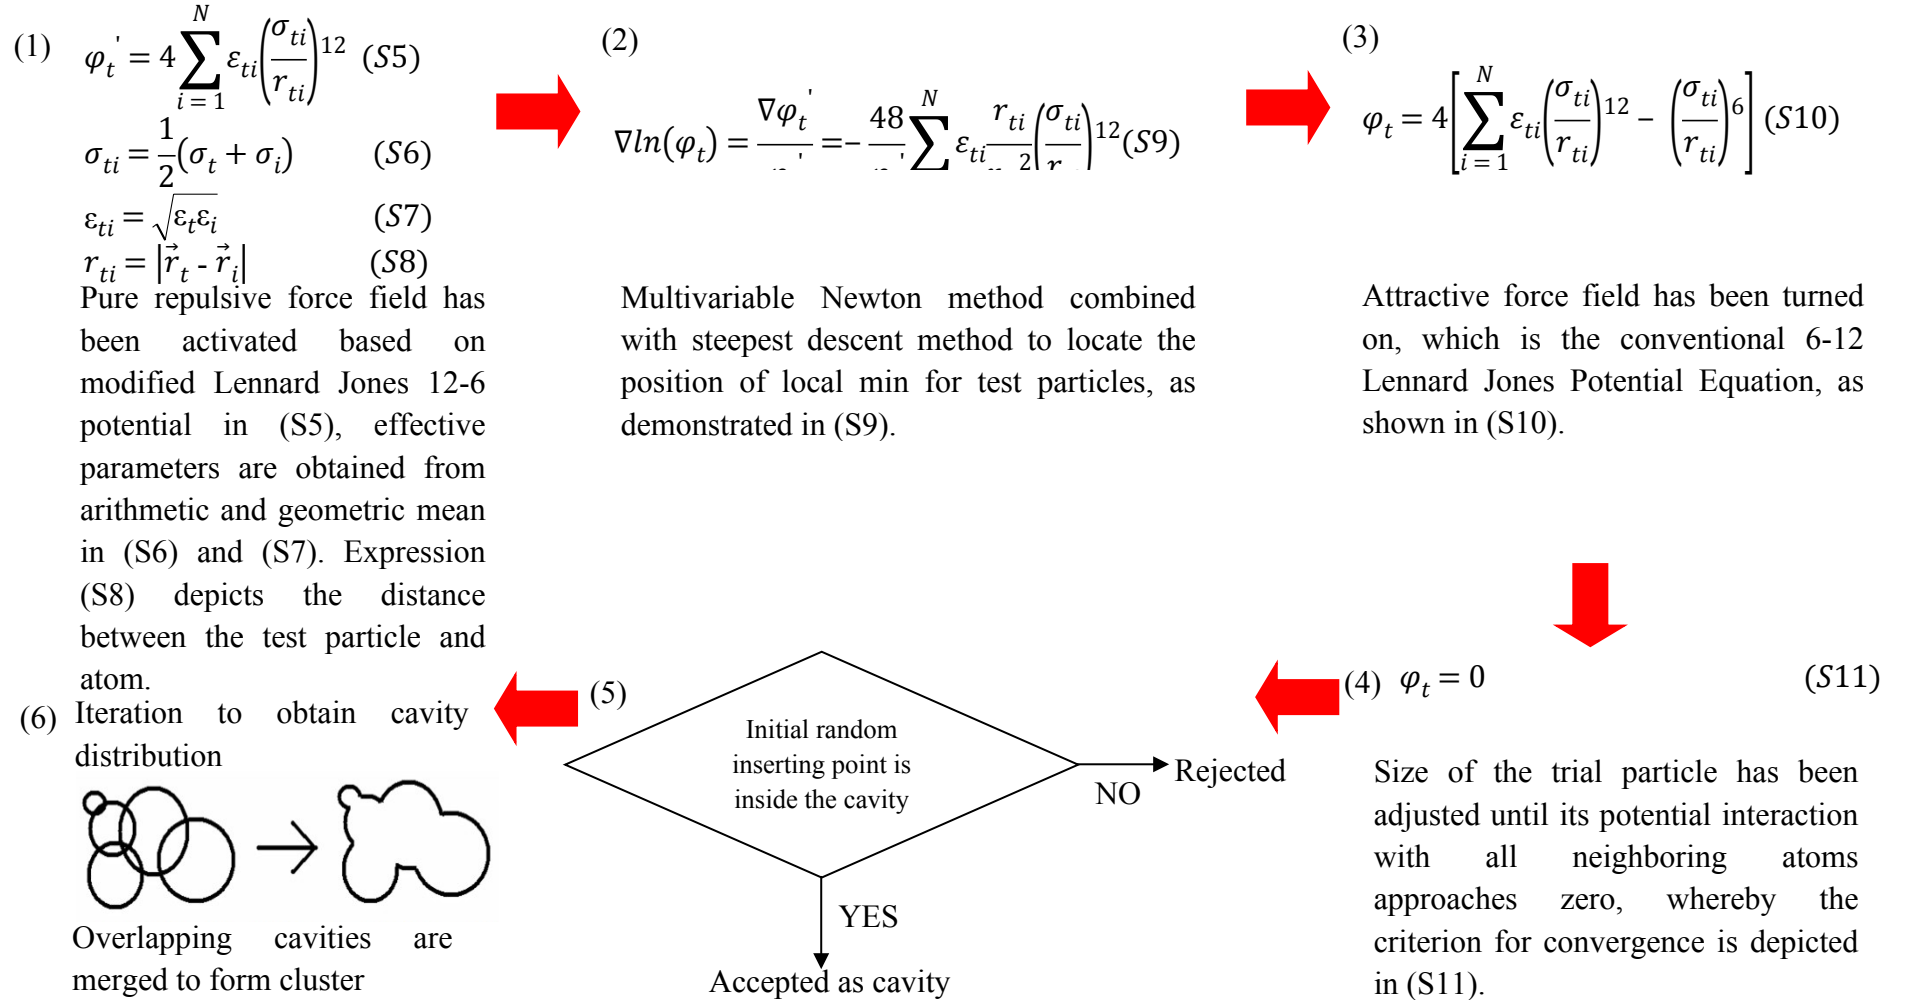

Figure S 1 Chronological development and fundamental theory underlying the CESA to determine cavity distribution of PSF polymeric membranes of varying thicknesses, adapted from In't Veld (2000) <sup>6</sup>

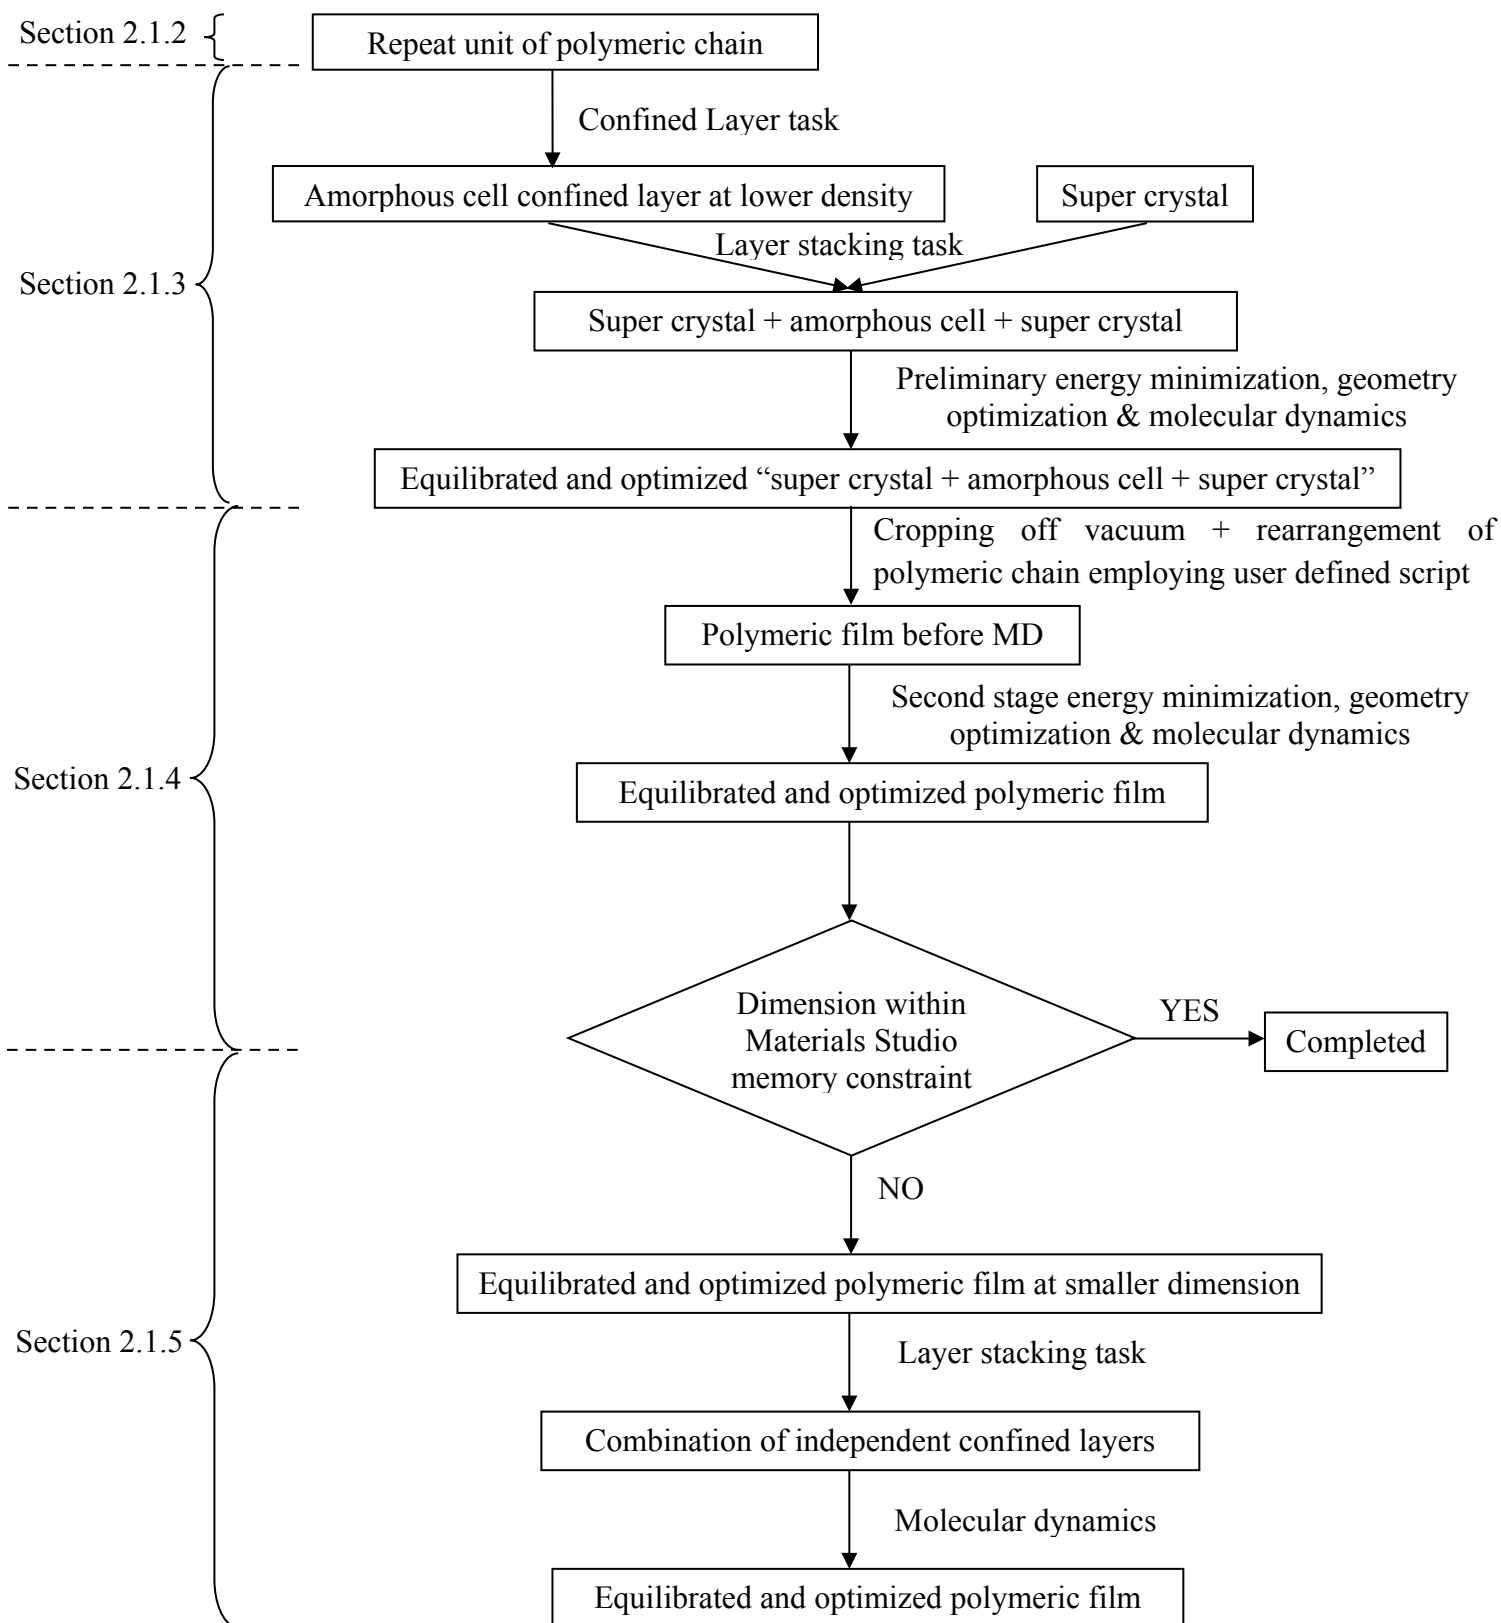

Figure S 2 Overview and chronological development in the Soft Confining Methodology for Ultrathin Films

## Supplementary Information

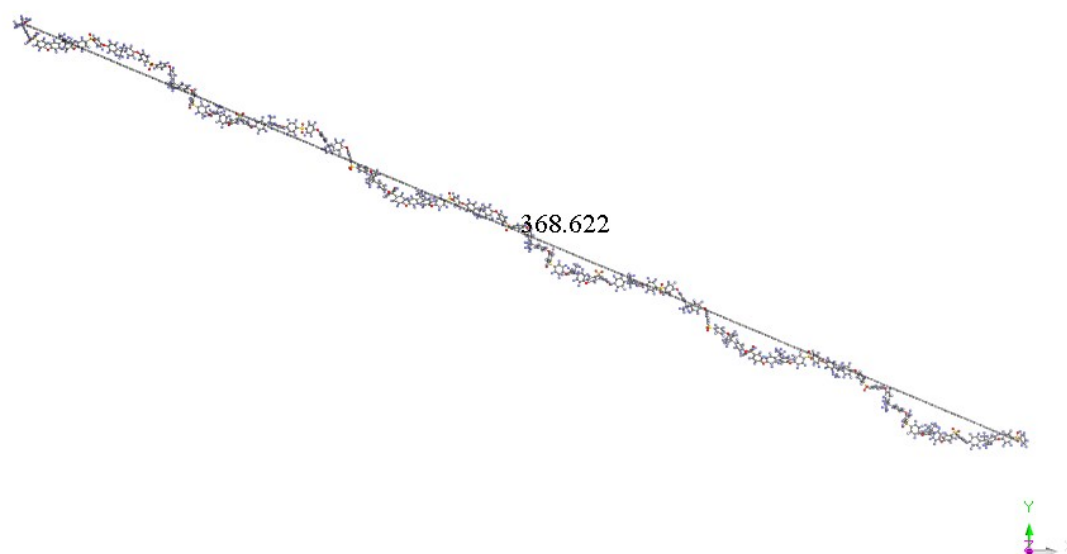

Figure S 3 Chain end-to-end distance of PSF chain initial configuration before molecular modelling treatment

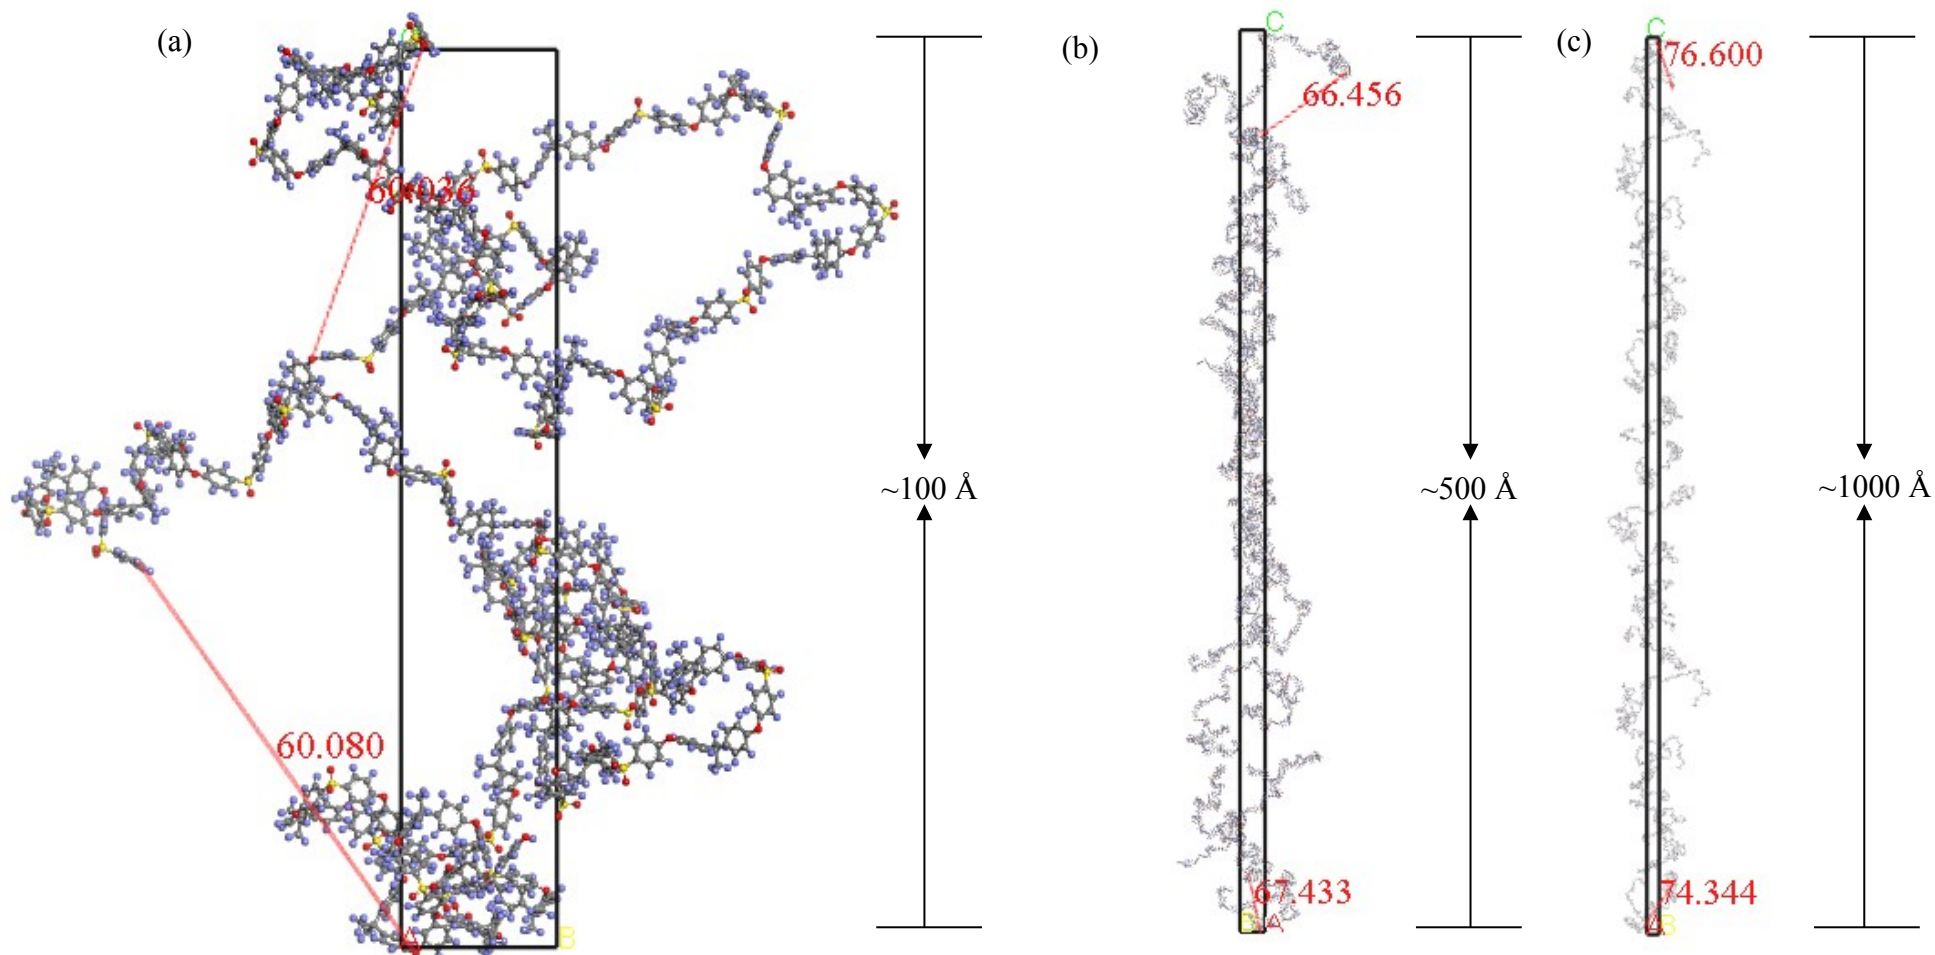

Figure S 4 Chain end-to-end-distance of final configuration in PSF polymeric membrane films of a)  $\sim 100$  Å (16.03  $\times$  16.03  $\times$  91.87) b)  $\sim 500$  Å (15.17  $\times$  15.17  $\times$  515.68) and c)  $\sim 1000$  Å (15.32  $\times$  15.32  $\times$  1026.79). Default view" within Materials Studio has been provided, whereby molecules are translated so that their centres of geometry are located in the simulation cell. Lines denote periodic boundary condition conditions in both the x and y directions, while z direction characterizes thickness of the polymeric film (The chain end-to-end distance of two PSF polymeric chains have been provided as examples for each thickness to guide readers)

## Supplementary Information

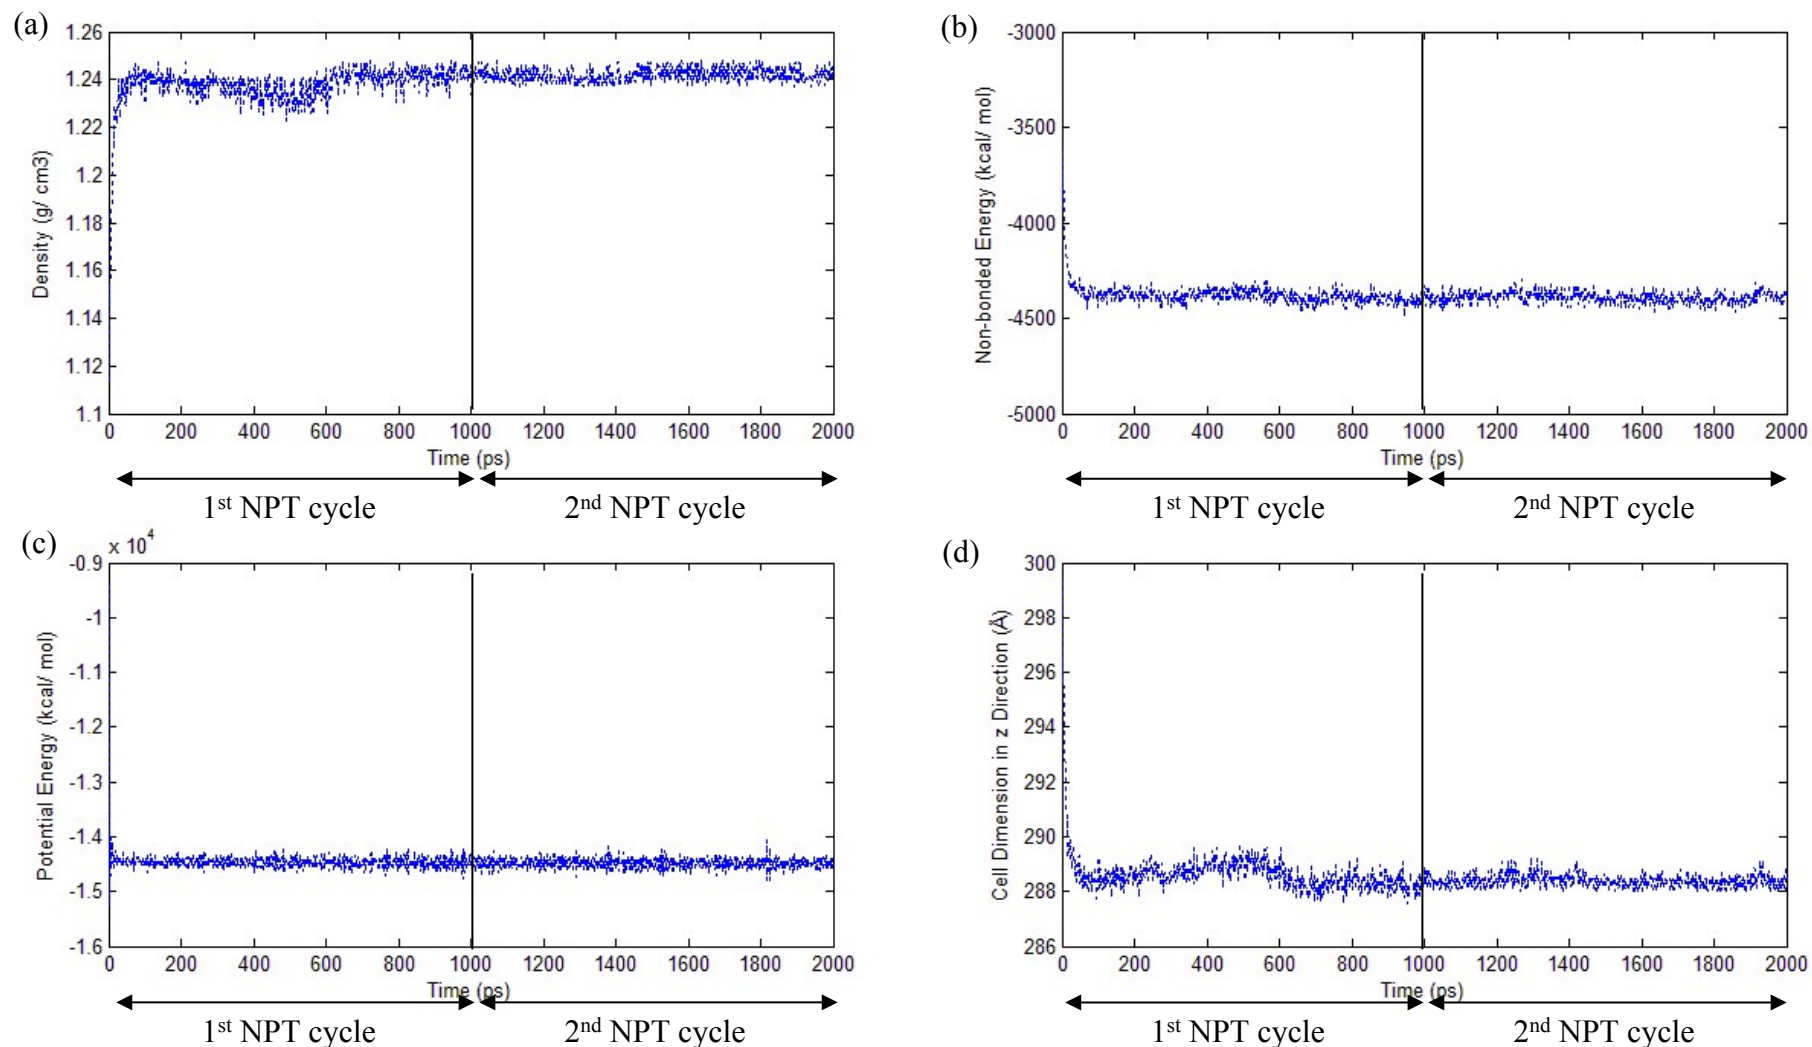

Figure S 5 Evolution change during molecular dynamics simulation for a) Density b) Non-bonded energy c) Potential energy and d) Cell dimension in PSF with  $\sim 300$  Å obtained via combination of three  $\sim 100$  Å structures via the layer to layer methodology

(Example of two cycles 1000 ps NPT molecular treatment has been provided)

## Abbreviation

|                    |                                                                                                                                                                              |
|--------------------|------------------------------------------------------------------------------------------------------------------------------------------------------------------------------|
| $\varphi_t'$       | Pure repulsive force field based on modified Lennard Jones (LJ) 12-6 potential, which characterizes the interaction energy of the test particle with the other $i$ particles |
| $\varepsilon_{ti}$ | Depth of the potential well of test particle with the other $i$ particles                                                                                                    |
| $\varepsilon_i$    | LJ parameter that characterizes depth of potential well of particle $i$                                                                                                      |
| $\varepsilon_t$    | LJ parameter that characterizes depth of potential well of test particle                                                                                                     |
| $\sigma_{ti}$      | Finite distance of test particle with the other $i$ particles at which the inter-particle potential is zero                                                                  |
| $\sigma_i$         | LJ parameter that characterizes finite distance of particle $i$                                                                                                              |
| $\sigma_t$         | LJ parameter that characterizes finite distance of test particle                                                                                                             |
| $r_{ti}$           | Distance of test particle with the other $i$ particles                                                                                                                       |
| $\vec{r}_i$        | The position vector of particle $i$                                                                                                                                          |
| $\vec{r}_t$        | The position vector of test particle                                                                                                                                         |
| $\varphi_t$        | Conventional 6-12 Lennard Jones potential, which characterizes the interaction energy of the test particle with the other $i$ particles                                      |

## References

1. K.-S. Chang, Y.-H. Huang, K.-R. Lee and K.-L. Tung, J. Membr. Sci., 2010, 354, 93-100.
2. H. Sun, P. Ren and J. R. Fried, Comput. Theor. Polym. Sci., 1998, 8, 229-246.
3. H. Sun, J. Phys. Chem. B, 1998, 102, 7338-7364.
4. , Accelrys Software Inc., 2015.
5. J. Yang, Y. Ren, A.-M. Tian and H. Sun, J. Phys. Chem. B, 2000, 104, 4951-4957.
6. P. J. in 't Veld, M. T. Stone, T. M. Truskett and I. C. Sanchez, J. Phys. Chem. B, 2000, 104, 12028-12034.
